# Supplementary material
Source: HighWire-hosted journal article supplement (https://cmajopen.ca/content/suppl/2019/02/18/7.1.E88)
Supplement: 2018-0167-original-submission.pdf [file 2018-0167-original-submission.pdf]

1  
2 **Respiratory syncytial virus-related outcomes from an abbreviated palivizumab dose regimen in**  
3 **children with congenital heart disease: A descriptive analysis**  
4

5 Jennifer Claydon<sup>1</sup>; Constantin R. Popescu<sup>1,2,3</sup>; Lana Shaiba<sup>2,#</sup>; Cheryl Christopherson<sup>1</sup>; Derek  
6 Human<sup>1,3,4</sup>; Richard Taylor<sup>5</sup>; Alfonso Solimano<sup>1,2</sup>; Pascal M. Lavoie<sup>\*,1,2,3</sup>  
7  
8  
9

10 **Affiliations:**  
11

- 12 <sup>1</sup> Children's & Women's Health Centre of British Columbia, Vancouver, Canada  
13 <sup>2</sup> Department of Pediatrics, Division of Neonatology, University of British Columbia, Vancouver,  
14 Canada  
15 <sup>3</sup> British Columbia Children's Hospital Research Institute, Vancouver, Canada  
16 <sup>4</sup> Department of Pediatrics, Division of Cardiology, University of British Columbia, Vancouver,  
17 Canada  
18 <sup>5</sup> Victoria General Hospital, Victoria, Canada  
19 # Current address: University of Toronto, Toronto, Canada  
20  
21

22  
23 **\*Corresponding Author:** Pascal Lavoie, MD PhD FRCPC  
24 Neonatologist  
25 British Columbia Children's Hospital Research Institute  
26 Room A4-147, Translational Research Building  
27 950 West 28th Avenue  
28 Vancouver, British Columbia, V5Z 4H4  
29 Tel: (604) 875-2135  
30 fax: (604) 875-3106  
31 email: [plavoie@cw.bc.ca](mailto:plavoie@cw.bc.ca)  
32  
33  
34

35 **Running Title:** Outcome of a 4-dose palivizumab schedule in children with CHD  
36  
37

38  
39 **Conflict of interest statement:** None of the authors have any conflict of interest to disclose.  
40  
41  
42  
43  
44  
45  
46  
47  
48  
49  
50  
51  
52  
53  
54  
55  
56  
57  
58  
59  
60

1  
2  
3  
4  
5  
6  
7  
8  
9  
10  
11  
12  
13  
14  
15  
16  
17  
18  
19  
20  
21  
22  
23  
24  
25  
26  
27  
28  
29  
30  
31  
32  
33  
34  
35  
36  
37  
38  
39  
40  
41  
42  
43  
44  
45  
46  
47  
48  
49  
50  
51  
52  
53  
54  
55  
56  
57  
58  
59  
60**ABSTRACT (250 words)**

**Background:** It has been hypothesized that 4 doses of palivizumab, a neutralizing monoclonal antibody against respiratory syncytial virus (RSV), administered within fixed season dates may reduce hospitalizations comparably to the standard 5-dose schedule. Here, we report outcomes in children with congenital heart disease approved to receive this 4-dose fixed-dates schedule in British Columbia.

**Method:** Population-based descriptive cohort analysis of all 406 approved palivizumab courses over four seasons (2012-2016) in 325 children with hemodynamically significant congenital heart disease enrolled in the British Columbia RSV Immunoprophylaxis Program. Primary outcome was in-season hospitalization for potential RSV-related lower respiratory tract infection. Secondary outcomes include timing of hospitalization in relation to dosing. Analysis was by intention-to-treat.

**Results:** Of 406 approved palivizumab courses, 391 were administered. In 33 cases (8.4%) an additional dose was given immediately after cardiac bypass surgery. There were 17 RSV-confirmed hospitalizations (median age 5.9; interquartile range 4 to 10 months) and 8 hospitalizations where RSV was not tested, for a maximum of 25 potential RSV-related hospitalizations (6.2 per 100 approvals, 95% confidence interval: 4.0 to 9.0). Twenty-four of 25 hospitalizations (96%) occurred before the fourth palivizumab dose. One RSV-related hospitalization occurred 52 days after the fourth dose, and this was RSV-confirmed. Forty (62%) of 65 hospitalizations were RSV-negative, with baseline clinical characteristics not different from those with RSV-confirmed hospitalizations.

**Interpretation:** In infants with hemodynamically significant congenital heart disease a 4-dose fixed-dates palivizumab schedule over a 6-month season provided seasonal protection that compares to the only clinical trial involving a standard five-dose schedule.

## INTRODUCTION

Respiratory syncytial virus (RSV) is a leading cause of lower respiratory tract infection in young children (1). Infants born prematurely, those with chronic lung or congenital heart diseases are at higher risk (2, 3). Most hospital admissions occur during the winter, so-called “RSV season”, which in most jurisdictions lasts six months (4). There is no vaccine against RSV. However, five seasonal doses of palivizumab, a neutralizing monoclonal antibody against RSV, has been shown to reduce hospitalizations in children with congenital heart disease less than two years, from 9.7% in the placebo group (95% confidence interval, 95%CI: 7.7 to 12%) to 5.3% in the palivizumab group (95%CI: 3.8 to 7.3%), based on one randomized controlled trial (5). Thus, contrary to conventional vaccines that are supposed to induce nearly complete protection in a majority of the population, palivizumab is a passive monoclonal antibody that only provides partial (~50%) protection as long as sufficiently elevated serum drug levels persist during the high viral exposure period (6).

A key question then is how many doses are necessary to achieve optimal protection over the typical 6-month RSV season. Several authors have suggested that a 4-dose schedule should perform nearly as well as the established 5-dose schedule in most settings while reducing unnecessary clinic visits for families, drug injections for children and costs to the health care system (4, 7-10). To this date British Columbia is the only jurisdiction that uses abbreviated 4-dose, fixed-date schedules (3, 10). Our group has recently reported outcomes from infants in the British Columbia RSV Immunoprophylaxis Program overall (11). However, children with congenital heart disease constitute a distinct subgroup of patients that tend to have more severe RSV infections, with hospitalization rates as high as 36% in absence of palivizumab (12). We report hospitalizations in children with congenital heart disease, who were approved to receive a 4-dose abbreviated palivizumab schedule in British Columbia.

## METHODS

Study design & setting: Descriptive, population-based cohort study of all children with congenital heart disease in the British Columbia RSV Program over 4 consecutive seasons (2012 to 2016) – this defined our sample size. The Program centrally manages all palivizumab administration provincially. Children younger than 12 months with hemodynamically significant congenital heart disease are universally approved to receive 4 doses. Children with congenital heart disease aged 12 to 24 months may also receive 4 palivizumab doses after clinical review by an expert panel, based on best available evidence.

Exposure: Within the Program, palivizumab is administered according to pre-specified fixed season dates starting on the third Monday of November until March 31. This period was defined based on a review of 16 seasons of provincial RSV hospitalization data (1994-2011) (13). After reviewing the pharmacokinetics of palivizumab, the Program concluded that 4 doses would confer sufficient protective serum drug levels over a typical 6-month RSV season (10). The American Academy of Pediatrics and Canadian Pediatric Society both recommend against palivizumab administration in infants who are still in hospital, instead favoring protecting them using infection control principles (2, 3). Accordingly, in British Columbia palivizumab is administered only to ambulatory children or just prior to hospital discharge.

Palivizumab is administered by RSV Program clinic nurses distributed across British Columbia in 87% of cases, or in family doctor’s offices in 13% of cases. Children receive up to four intramuscular doses of 15 mg/kg/dose: the second dose is given 21 days (maximum 28 days) after the first dose and

subsequent doses are given 28 days (maximum 35 days) apart. One additional dose is administered if an infant undergoes cardiopulmonary bypass during the season (immediately post-procedure). No doses are administered after March 31 of a given season.

Outcomes & follow-up period: The main outcome was potential RSV-related hospitalization, which included RSV-confirmed or RSV-undetermined lower respiratory tract infection, as defined below. Follow-up occurred between November 01 and April 30 for each season.

Data collection & definitions: Hospitalizations were centrally reported by clinic nurses to the RSV Program Provincial Clinic Coordinator (CC). Additionally, hospitalizations for lower respiratory tract infections were extracted from the Canadian Institute of Health Informatics discharge abstract database from health authorities in British Columbia, using 7 International Statistical Classification of Diseases and Related Health Problems-10 diagnostic codes: B97.4-Respiratory syncytial virus as the cause of diseases classified to other chapters; J12.1-Respiratory syncytial virus pneumonia; J12.9-Viral pneumonia, unspecified; J20.5-Acute bronchitis due to respiratory syncytial virus; J20.9-Acute bronchitis, unspecified; J21.0-Acute bronchiolitis due to respiratory syncytial virus; J21.9-Acute bronchiolitis, unspecified.

The diagnosis of lower respiratory tract infection was confirmed by a review of medical charts, including viral testing (nasopharyngeal swabs) whenever available (LS, CP, JC, CC). Hospitalizations where children tested positive for RSV were considered *RSV-confirmed*, or children not tested for RSV were considered *RSV-undetermined*. Both categories were included in conservative estimates of RSV-related hospitalizations. Hospitalizations where children tested negative for RSV were considered *RSV-negative*. Data were electronically compiled in a spreadsheet, according to their occurrence before the first dose of palivizumab (either before, or after the season start in the case of “late” referrals), within the dosing period (including up to 35 days after the fourth dose), or more than 35 days after the fourth palivizumab dose. Mortality is reported as of the end of the 2016 follow-up period for all children. All data were manually reviewed for accuracy by two investigators (JC, PML).

In addition, the following baseline demographic data was analyzed: type of congenital heart disease, whether a surgical correction was performed (including date and whether cardiopulmonary bypass was required), palivizumab doses (with dates). Congenital heart diseases were categorized by a Cardiologist (DH), as: cyanotic lesion, left to right shunt lesions, left ventricular obstruction (including coarctation of the aorta), combined lesions, cardiomyopathy or unspecified heart defects. Any missing data was treated as such and reported in the tables.

Statistical analyses: Data was analyzed per child per RSV season, except for data related to children’s baseline demographics. This means that if a child received palivizumab for more than one RSV season, each season was counted as a separate event (referred to as *approvals*). Results were analyzed descriptively using 95% confidence intervals calculated using the binomial exact method (<http://www.sample-size.net/confidence-interval-proportion/>), standard deviations, or interquartile range (depending on expected data distribution). Analysis was by intention-to-treat.

Ethics approval: This study was approved by the Children’s and Women’s Research Ethics Board (#H11-03424).

## RESULTS

**Study population:** The clinical characteristics of the 325 children in the study are presented in **Table 1**. Most (74%) were born at term (n=236 of 318 children in whom gestational age data were available) or were younger than 6 months at the start of the RSV season (n=242/325). Nearly half (n=151; 46%) had cyanotic heart defects, followed by hemodynamically significant left-right shunt (n=129; 40%), left ventricular outflow tract obstruction (n=18; 6%), cardiomyopathies (n=15; 5%), a combination of complex anomalies (n=9; 3%) or unspecified heart defects (n=3; 1%).

**Palivizumab administration:** Among 325 children with congenital heart disease, 406 palivizumab courses were approved. The majority of courses were approved during the child's first season (n=288; 71%). One hundred (25%) courses were approved in a child's second season, and 18 (4%) were approved the third season. Seventy-two children (22%) received palivizumab for more than one season.

Of the 406 approved courses of palivizumab, 391 were administered (**Figure 1**). Twelve were never administered because of parent/legal guardian refusal (n=10) or prolonged hospitalization during the season (n=2). In three courses, the number of palivizumab doses could not be determined.

Of the 391 palivizumab courses administered, 351 (90%) included up to 4 doses, and 38 (9.7%) included an additional fifth doses received: in 33 cases (8.4%) immediately after cardiac bypass surgery and in 5 cases (1.3%) at physicians' discretion. Two courses (0.5%) included six doses, at physicians' discretion. Another 30 courses (7.7%) were not completed: seven due to non-compliance during the season, three as a result of hospital admission, four due to the child's death, two at the treating physician's discretion and 14 for unspecified reasons.

**Outcomes:** Of 406 approvals there was one hospitalization in 64 approvals and more than one hospitalization in 17 approvals, for a total of 89 hospitalizations (21.9%) over 4 seasons (**Figure 2**).

In 17 hospitalizations children tested positive for RSV, for a rate of RSV-confirmed hospitalizations of 4.2 per 100 season-approvals (95%CI: 2.5 to 6.6%). In 8 cases children were not tested for RSV, for a maximum rate of potential RSV-related hospitalizations of 6.2 per 100 approvals (95%CI: 4.0 to 9.0%). Sixty-four children (64 of 406 = 16%) tested positive for non-RSV pathogens.

Among 25 children with RSV-confirmed or RSV-undetermined hospitalization, 20 were in their first RSV season, 5 in their second season and none in their third RSV season. Twenty-three of these 25 children (92%) were 12 months or younger, and the other two children were 21 and 22 months, respectively. One had a corrected transposition of the great arteries with atrio-ventricular discordance and significant residual systemic (left) outflow tract obstruction, and the other had Down syndrome.

Among the 17 RSV-confirmed hospitalizations, two occurred after the start of the season, on November 19 and November 27, but before a Program application had been received. Fourteen occurred within the dosing period. The one remaining admission presented 52 days after the fourth dose. Among the 7 RSV-undetermined hospitalizations, 1 occurred before a Program application had been received on November 30, 6 occurred within the dosing period: 2 of which were non-adherent with the dosing schedule and 1 occurred 29 days after the fourth palivizumab dose.

The clinical characteristics of children hospitalized for RSV-confirmed hospitalizations were similar to those hospitalized for RSV-negative lower respiratory tract infection (**Table 2**). No deaths were

1  
2 attributable to lower respiratory tract infection in this cohort. None of the 10 children with parent/legal  
3 guardian refusal of palivizumab or of the 3 children whose number of doses could not be determined  
4 had a lower respiratory tract infection-related hospitalization.  
5  
6

## 7 8 **INTERPRETATION** 9

10 In this study, we report RSV-related hospitalizations in children with congenital heart disease who  
11 were approved to receive British Columbia's 4-dose fixed-season abbreviated palivizumab schedule.  
12 We show that in a geographical area where the RSV season consistently spans from early November to  
13 late April, all but one (96%) RSV-related hospitalizations occurred before the fourth dose, and not as a  
14 result of starting immunoprophylaxis late in the season. So these cases were also not the result of a  
15 schedule failure. This result is consistent with the fact that the vast majority of RSV infections occur in  
16 December and January in North America and Europe, months during which coverage with palivizumab  
17 is expected to be no different between 4- and 5-dose schedules, and with the fact that palivizumab only  
18 prevents about 50% of RSV-related hospitalizations (5, 14).  
19  
20

21 These data support analyses by Weinberger indicating that elimination of one of five monthly doses,  
22 and initiating a reduced-dose schedule based on the averaged season onset would not result in a  
23 substantial decline in protection (4). Our data is also in keeping with American Academy of Pediatrics  
24 and Canadian Pediatric Society's most recent guidelines suggesting that less than five palivizumab  
25 doses may provide sufficient seasonal protection in infants discharged after the start of the RSV season  
26 (2, 3). However, up until now there had been no real-life direct clinical evidence to support this  
27 contention. To the best of our knowledge, British Columbia is the only jurisdiction that has universally  
28 adopted this abbreviated schedule. A major strength of our study is its population-based nature with  
29 high follow-up rates (>99%) under the centralized RSV Program, the cross-referencing of our RSV  
30 Program data with a provincial hospitalization database, intention-to-treat analysis, and inclusion of a  
31 6-month fixed-date observation (November 01 to April 30), which spans before and after the drug  
32 administration periods. Further robustness is achieved by reporting data over multiple years, facilitating  
33 generalization across seasons, considering the biennial pattern of RSV epidemics (15).  
34  
35  
36

37 Nearly 1,500 children are newly diagnosed with critical congenital heart disease each year in Canada  
38 (16). For some of these families the logistics of travel to clinics during the winter can be considerable,  
39 particularly in the geographical context of British Columbia. In our cohort, 42 palivizumab courses  
40 were either not (n = 12) or partially received (n = 30). Of those, 31 palivizumab courses were missed  
41 essentially because parents declined or were not able to attend Program clinics. Reducing the need for  
42 unnecessary treatments can help families focus on other visits that may truly benefit their child in  
43 addition to the direct drug cost and other savings conferred by an abbreviated palivizumab schedule.  
44  
45

46 The decision of the BC RSV Program to administer an abbreviated course of palivizumab was largely  
47 based on pharmacokinetic data. However, the pharmacokinetics of palivizumab may not be the only  
48 reason why fewer doses appear to be effective. Indeed, we previously suggested that neutralizing RSV  
49 antibodies persist in children beyond what would be expected on the sole basis of drug  
50 pharmacokinetics (17). Therefore, it appears that palivizumab serum levels are not the only factor  
51 conferring protection against RSV towards the end of the season and that antibodies naturally acquired  
52 from a subclinical exposure to the virus at the peak of the season might provide substantial additional  
53 protection towards the end of the season (17).  
54  
55  
56  
57  
58  
59  
60

1  
2 Limitations: First, our data from a single province mandates confirmation in other jurisdictions.  
3 Second, in the absence of a direct comparison group, it is impossible to ascertain the number of RSV  
4 hospitalizations that might have been prevented should a standard 5-dose palivizumab regimen been  
5 used. Regarding this latter point, with only one hospitalization that occurred after the 4<sup>th</sup> palivizumab  
6 dosing period, it is extremely unlikely that additional palivizumab doses would have statistically  
7 significantly changed our Program's outcomes. Moreover, our outcomes are comparable to the only  
8 RCT done in children with congenital heart disease (5). The Canadian Registry of Palivizumab  
9 (CARESS) reports 260 hospitalizations, including 35 cases where RSV testing was positive, in 1909  
10 children over a 10-year study period (2005-2015) elsewhere in Canada where five doses are offered  
11 (18). However, in 31 hospitalized CARESS children (15% cases), RSV testing was not done.  
12 Moreover, CARESS is not a truly population-based registry. We combined both RSV-confirmed and  
13 RSV-undetermined hospitalizations, which may overestimate RSV-related hospitalization rates in our  
14 study. When we consider these factors, RSV hospitalization rates in children with congenital heart  
15 diseases in British Columbia do not appear different than in the rest of Canada, or in other populations  
16 (**Supplemental Table 1**). Finally, our experience may not apply to areas where RSV epidemics occur  
17 in a non-seasonal manner such as Florida and Alaska, and in other tropical or sub-tropical areas (19).  
18  
19  
20

21 Conclusions: Our experience in British Columbia demonstrates the protection achieved by a fixed-date  
22 Program with an abbreviated 4-dose schedule in children with congenital heart disease. These data has  
23 a strong theoretical underpinning and warrants consideration in jurisdictions with seasonal RSV.  
24 Nonetheless, it is also important to point out that RSV was responsible for only about 19% of lower  
25 respiratory tract infection-related admissions in our cohort. Therefore, it is critical to continue to  
26 emphasize other preventive measures, including family education towards proper hand hygiene,  
27 breastfeeding and limiting infectious exposures in high risk children.  
28  
29  
30

## 31 **ACKNOWLEDGMENTS**

32  
33  
34 We thank all the practitioners in the British Columbia RSV Program who made this study possible,  
35 George Scott MacRae, Consultant, PHSA Performance Measurement and Reporting, who provided the  
36 Discharge Abstract Database cross-referencing data, and Laurence Bayzand, Director of Intercampus  
37 Operations, Children's and Women's Hospitals, for his direction, vision and support of the RSV  
38 Program. This study was partly funded by the RSV Program, the British Columbia Lung Association  
39 and Canadian Institutes of Health Research (MOP-123478 to PML). JC was funded by the British  
40 Columbia Children's Hospital. PML is supported by Investigator Awards from the British Columbia  
41 Children's Hospital and Michael Smith Foundation for Health Research.  
42  
43  
44  
45  
46  
47  
48  
49  
50  
51  
52  
53  
54  
55  
56  
57  
58  
59  
60

1  
2  
3  
4  
5  
6  
7  
8  
9  
10  
11  
12  
13  
14  
15  
16  
17  
18  
19  
20  
21  
22  
23  
24  
25  
26  
27  
28  
29  
30  
31  
32  
33  
34  
35  
36  
37  
38  
39  
40  
41  
42  
43  
44  
45  
46  
47  
48  
49  
50  
51  
52  
53  
54  
55  
56  
57  
58  
59  
60**TABLES & FIGURE LEGENDS**

| <b>Characteristic</b>                                | <b>n = 325 children</b> | <b>Number of children with data</b> |
|------------------------------------------------------|-------------------------|-------------------------------------|
| Gestational age, weeks (mean $\pm$ SD)               | 36.9 $\pm$ 6.2          | 318                                 |
| Birth weight, g (mean $\pm$ SD)                      | 2870 $\pm$ 871          | 319                                 |
| Gender (%; 95%CI)                                    | 52 [46 – 57]            | 324                                 |
| Age at start of first season, months (median; [IQR]) | 2.2 [0 – 6.0]           | 325                                 |
| Surgical correction* (%; [95%CI])                    | 51 [45 – 57]            | 315                                 |
| Required bypass procedure (%; [95%CI])               | 34 [29 – 40]            | 288                                 |
| Mortality (%; [95%CI])                               | 4.0 [2.1 – 6.7]         | 325                                 |

**Table 1:** Clinical characteristics of children with congenital heart disease

\*Indicates a surgical correction for the congenital heart defect during the period of follow-up; 95%CI: 95% confidence interval; SD: standard deviation; IQR: interquartile range.



| <b>Clinical characteristics</b>                         | <b>RSV-confirmed<br/>(n = 17)</b> | <b>Number of<br/>children with data</b> | <b>RSV-negative<br/>(n = 40)</b> | <b>Number of<br/>children with data</b> |
|---------------------------------------------------------|-----------------------------------|-----------------------------------------|----------------------------------|-----------------------------------------|
| Gestational age, weeks (mean $\pm$ SD)                  | 37.7 $\pm$ 2.5                    | 17                                      | 37.8 $\pm$ 2.3                   | 40                                      |
| Birth weight, g (mean $\pm$ SD)                         | 2939 $\pm$ 748                    | 17                                      | 2778 $\pm$ 651                   | 40                                      |
| Gender (% male; [95%CI])                                | 47 [23 – 72]                      | 17                                      | 50 [34 – 66]                     | 40                                      |
| Age at first in-season admission, months (median [IQR]) | 5 [4 – 10]                        | 17                                      | 6 [4 – 13]                       | 40                                      |
| Type of congenital heart disease* (%; [95%CI])          |                                   | 17                                      |                                  | 40                                      |
| Cyanotic                                                | 47 [23 – 72]                      |                                         | 50 [34 – 66]                     |                                         |
| L-R shunt                                               | 35 [14 – 62]                      |                                         | 33 [19 – 49]                     |                                         |
| Obstructive lesion                                      | 12 [1.5 – 36]                     |                                         | 5.0 [0.6 – 17]                   |                                         |
| Cardiomyopathy                                          | 5.9 [0.0 – 29]                    |                                         | 2.5 [0.0 – 13]                   |                                         |
| Combination                                             | 0                                 |                                         | 10 [2.8 – 24]                    |                                         |
| Unspecified                                             | 0                                 |                                         | 0                                |                                         |
| Surgical correction (%; [95%CI])                        | 47 [23 – 72]                      | 17                                      | 48 [32 – 64] <sup>‡</sup>        | 39                                      |
| Required bypass procedure (%; [95%CI])                  | 25 [7.3 – 52] <sup>‡</sup>        | 16                                      | 40 [24 – 58] <sup>‡</sup>        | 34                                      |
| Mortality (%; [95%CI])                                  | 12 [1.5 – 36]                     | 17                                      | 7.3 [1.5 – 20]                   | 40                                      |

**Table 2:** Clinical characteristics of infants with RSV-confirmed versus RSV-negative lower respiratory tract infection

\*Before surgical correction.

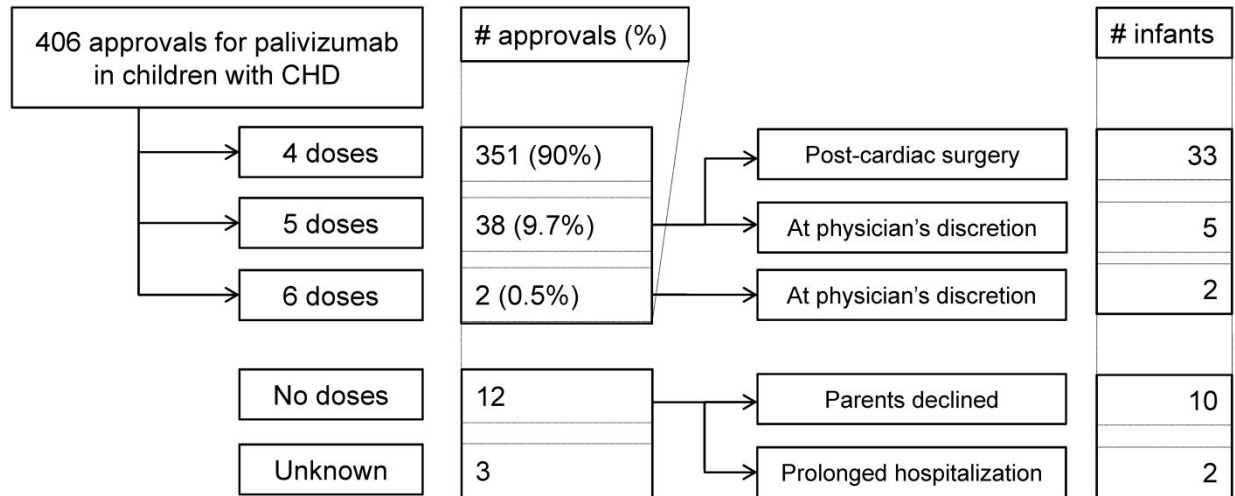

**Figure 1:** Intention-to-treat distribution of palivizumab doses administered to young children with congenital heart disease in British Columbia between November 2012 and April 2016.

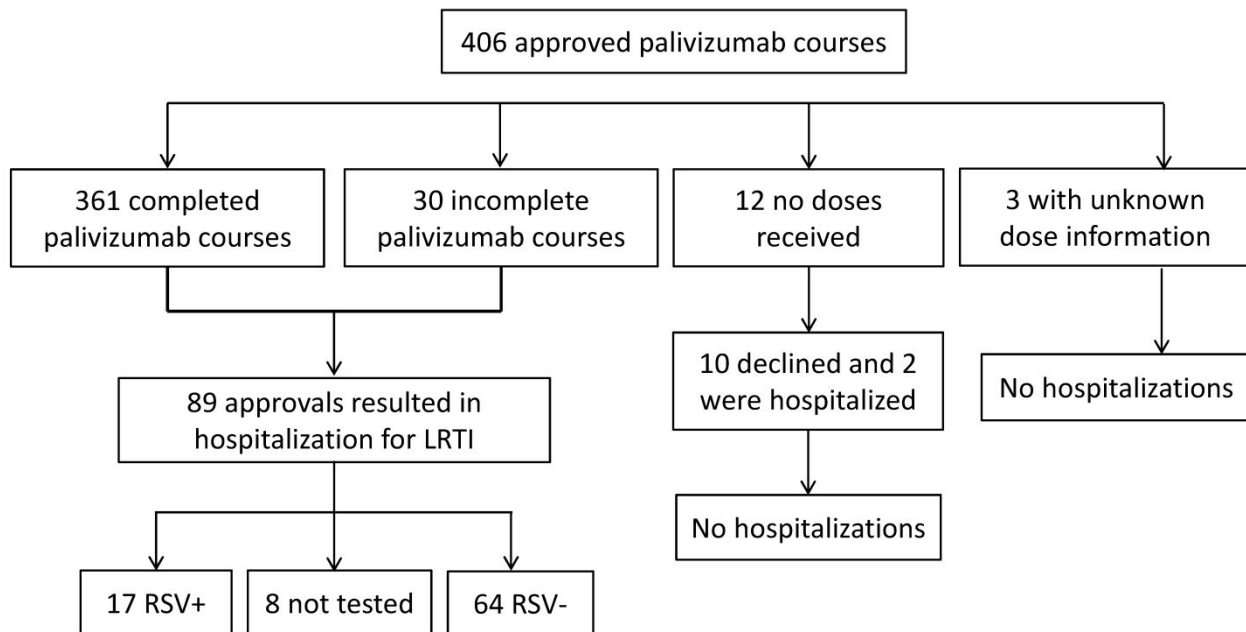

**Figure 2:** Lower respiratory tract infection hospitalization outcomes in young children with congenital heart disease enrolled in the British Columbia provincial palivizumab program between November 2012 and April 2016. Data is reported as number of children-approvals (i.e. approvals for each season in children who received palivizumab for more than one season is counted separately).

**Supplemental Table 1:** Population-based study data on rates of RSV hospitalizations in young children with congenital heart disease

| <b>Population</b>                                                                  | <b>Study period</b>           | <b>Outcome measure</b>                                                                                           | <b>Estimates</b>                                                                                                                              | <b>Use of palivizumab</b>                                            | <b>Reference</b>        |
|------------------------------------------------------------------------------------|-------------------------------|------------------------------------------------------------------------------------------------------------------|-----------------------------------------------------------------------------------------------------------------------------------------------|----------------------------------------------------------------------|-------------------------|
| Tennessee Medicaid Program (USA) (248,652 child-years)                             | July 1989 – June 1993         | RSV-associated hospitalizations (6.3% of were coded specifically for RSV, and 93.7% were coded as bronchiolitis) | Infants < 6 months: 12.08%; 6 to <12 mo: 6.35%; 12 to 24 months: 1.82%; 24 to 36 months: 0.48%                                                | Not specified                                                        | Boyce 2000 (20)         |
| Karolinska Hospital, Stockholm (48,715 population catchment area)                  | 1987 – 1998                   | RSV-confirmed hospitalization (nasopharyngeal swab with direct immunofluorescence ± viral culture)               | 6.4% and 2.8% during early and late RSV season, respectively                                                                                  | Not specified                                                        | Eriksson 2002 (21)      |
| Bern, Switzerland (51,346 births)                                                  | July 1997 – June 2003         | RSV-confirmed hospitalization per 100 children-years (nasopharyngeal swab with direct immunofluorescence)        | Infants <6 months: 2.5% (95%CI: 0.8 to 5.6); <12 months: 2.0% (0.9 to 3.8); 12 to 24 months: 0.5% (0.1 to 1.8); <24 months: 1.3% (0.6 to 2.3) | Not specified                                                        | Duppenthaler 2004 (22)  |
| CARESS registry: 27 hospital sites in Canada (508 children prospectively followed) | 2005 – 2009 RSV seasons       | RSV-confirmed hospitalization                                                                                    | 1.99%                                                                                                                                         | Yes (enrollment criteria)                                            | Mitchell 2011(23)       |
| 57 hospital in Spain (1,896,426 births)                                            | 2004 – 2008 (Oct 1 to Apr 30) | Hospital admission due to acute respiratory tract infection                                                      | 3.8%                                                                                                                                          | Yes (over 90% of patients)                                           | Medrano Lopez 2010 (24) |
| Denmark (452,205 children)                                                         | Jan 1997 – June 2003          | RSV hospitalization defined by the first positive RSV test                                                       | Incidence rate ratio (95% CI) 1.7 (1.45–1.99)                                                                                                 | Yes (118 patients)                                                   | Kristensen 2012 (25)    |
| Tertiary care Centre, Southern Austria (602 infants)                               | Jan 2004 – Dec 2008           | LRTI hospitalization with a positive RSV test result                                                             | 7.3% for hemodynamically significant and 10.4% for non-hemodynamically significant congenital heart disease (Overall 9.6%)                    | Yes in 41 children (27%) with HSCHD and 10 children (2%) with HNSCHD | Resch 2016 (26)         |
| County of Vestfol, Norway (43,470 live births)                                     | Jan 1987 – Jul 2 005          | Admittances for RSV-infections (but also bronchiolitis in ICD-9)                                                 | 9.2% for hemodynamically significant and 3.3% for non-hemodynamically significant congenital heart disease (Overall                           | Not specified                                                        | Meberg 2006 (27)        |

1  
2  
3  
4  
5  
6  
7  
8  
9  
10  
11  
12  
13  
14  
15  
16  
17  
18  
19  
20  
21  
22  
23  
24  
25  
26  
27  
28  
29  
30  
31  
32  
33  
34  
35  
36  
37  
38  
39  
40  
41  
42  
43  
44  
45  
46  
47

| Population                     | Study period | Outcome measure                              | Estimates                                                  | Use of palivizumab | Reference          |
|--------------------------------|--------------|----------------------------------------------|------------------------------------------------------------|--------------------|--------------------|
| Taiwan (1,168,866 live births) | 1997 – 2013  | Hospitalization for RSV-specific ICD-9 codes | 4.8%)<br>Hospitalization OR 3.5 (children 12 to 23 months) | Not specified      | Friedman 2017 (28) |

Confidential

## REFERENCES

1. Shi T, McAllister DA, O'Brien KL, Simoes EAF, Madhi SA, Gessner BD, et al. Global, regional, and national disease burden estimates of acute lower respiratory infections due to respiratory syncytial virus in young children in 2015: a systematic review and modelling study. *Lancet*. 2017 Sep 2;390(10098):946-58. PubMed PMID: 28689664. Pubmed Central PMCID: 5592248.
2. Brady MT. Updated guidance for palivizumab prophylaxis among infants and young children at increased risk of hospitalization for respiratory syncytial virus infection. *Pediatrics*. 2014 Aug;134(2):415-20. PubMed PMID: 25070315. Epub 2014/07/30. eng.
3. Robinson JL, Le Saux N, Canadian Paediatric Society ID, Immunization C. Preventing hospitalizations for respiratory syncytial virus infection. *Paediatr Child Health*. 2015 Aug-Sep;20(6):321-33. PubMed PMID: 26435673. Pubmed Central PMCID: 4578474.
4. Weinberger DM, Warren JL, Steiner CA, Charu V, Viboud C, Pitzer VE. Reduced-Dose Schedule of Prophylaxis Based on Local Data Provides Near-Optimal Protection Against Respiratory Syncytial Virus. *Clin Infect Dis*. 2015 Apr 22. PubMed PMID: 25904370.
5. Feltes TF, Cabalka AK, Meissner HC, Piazza FM, Carlin DA, Top FH, Jr., et al. Palivizumab prophylaxis reduces hospitalization due to respiratory syncytial virus in young children with hemodynamically significant congenital heart disease. *J Pediatr*. 2003 Oct;143(4):532-40. PubMed PMID: 14571236.
6. Subramanian KN, Weisman LE, Rhodes T, Ariagno R, Sanchez PJ, Steichen J, et al. Safety, tolerance and pharmacokinetics of a humanized monoclonal antibody to respiratory syncytial virus in premature infants and infants with bronchopulmonary dysplasia. MEDI-493 Study Group. *Pediatr Infect Dis J*. 1998 Feb;17(2):110-5. PubMed PMID: 9493805.
7. Gutfraind A, Galvani AP, Meyers LA. Efficacy and optimization of palivizumab injection regimens against respiratory syncytial virus infection. *JAMA Pediatr*. 2015 Apr;169(4):341-8. PubMed PMID: 25706618. Epub 2015/02/24. eng.
8. Panozzo CA, Hampp C. Can a Reduced-Dose Prophylaxis Schedule Provide Adequate Coverage Against Respiratory Syncytial Virus Infection? *Clin Infect Dis*. 2015 Apr 22. PubMed PMID: 25904371.
9. Zaaier HL, Vandenbroucke-Grauls CM, Franssen EJ. Optimum dosage regimen of palivizumab? *Ther Drug Monit*. 2002 Jun;24(3):444-5. PubMed PMID: 12021640. Epub 2002/05/22. eng.
10. Solimano A, Kwan E, editors. Revisiting palivizumab (PVZ) dosing recommendations based on published pharmacokinetics data. *Pediatric Academic Societies Annual Meeting*; 2012 April 28 - May 01; Boston, MA.
11. Lavoie PM, Solimano A, Taylor R, Kwan E, Claydon J, Turvey SE, et al. Outcomes of Respiratory Syncytial Virus Immunoprophylaxis in Infants Using an Abbreviated Dosing Regimen of Palivizumab. *JAMA Pediatr*. 2016 Feb;170(2):174-6. PubMed PMID: 26720836.
12. Resch B, Brunner K, Rodl S. Characteristics of severe RSV infection needing intensive care. *Eur J Pediatr*. 2018 May 8. PubMed PMID: 29740691.
13. Marr N, Wang TI, Kam SH, Hu YS, Sharma AA, Lam A, et al. Attenuation of respiratory syncytial virus-induced and RIG-I-dependent type I IFN responses in human neonates and very young children. *J Immunol*. 2014 Feb 1;192(3):948-57. PubMed PMID: 24391215.
14. Connor EM. Palivizumab, a humanized respiratory syncytial virus monoclonal antibody, reduces hospitalization from respiratory syncytial virus infection in high-risk infants. The IMPact-RSV Study Group. *Pediatrics*. 1998 Sep;102(3 Pt 1):531-7. PubMed PMID: 9738173.
15. Lyon JL, Stoddard G, Ferguson D, Caravati M, Kaczmarek A, Thompson G, et al. An every other year cyclic epidemic of infants hospitalized with respiratory syncytial virus. *Pediatrics*. 1996 Jan;97(1):152-3. PubMed PMID: 8545218.

16. Wong KK, Fournier A, Fruitman DS, Graves L, Human DG, Narvey M, et al. Canadian Cardiovascular Society/Canadian Pediatric Cardiology Association Position Statement on Pulse Oximetry Screening in Newborns to Enhance Detection of Critical Congenital Heart Disease. *The Canadian journal of cardiology*. 2017 Feb;33(2):199-208. PubMed PMID: 28043739.
17. Claydon J, Sur A, Callejas A, Ladd M, Kwan E, Taylor R, et al. Respiratory syncytial virus-neutralizing serum antibody titers in infants following palivizumab prophylaxis with an abbreviated dosing regimen. *PLoS One*. 2017;12(4):e0176152. PubMed PMID: 28437470. Pubmed Central PMCID: 5402955.
18. Li A, Wang DY, Lanctot KL, Mitchell I, Paes BA, Investigators C. Comparing First- and Second-year Palivizumab Prophylaxis in Patients With Hemodynamically Significant Congenital Heart Disease in the CARESS Database (2005-2015). *Pediatr Infect Dis J*. 2017 May;36(5):445-50. PubMed PMID: 28403044.
19. Obando-Pacheco P, Justicia-Grande AJ, Rivero-Calle I, Rodriguez-Tenreiro C, Sly P, Ramilo O, et al. Respiratory Syncytial Virus Seasonality: A Global Overview. *J Infect Dis*. 2018 Jan 30. PubMed PMID: 29390105.
20. Boyce TG, Mellen BG, Mitchel EF, Jr., Wright PF, Griffin MR. Rates of hospitalization for respiratory syncytial virus infection among children in medicaid. *J Pediatr*. 2000 Dec;137(6):865-70. PubMed PMID: 11113845.
21. Eriksson M, Bennet R, Rotzen-Ostlund M, von Sydow M, Wirgart BZ. Population-based rates of severe respiratory syncytial virus infection in children with and without risk factors, and outcome in a tertiary care setting. *Acta Paediatr*. 2002;91(5):593-8. PubMed PMID: 12113331. Epub 2002/07/13. eng.
22. Duppenhaler A, Ammann RA, Gorgievski-Hrisoho M, Pfammatter JP, Aebi C. Low incidence of respiratory syncytial virus hospitalisations in haemodynamically significant congenital heart disease. *Archives of disease in childhood*. 2004 Oct;89(10):961-5. PubMed PMID: 15383442. Pubmed Central PMCID: PMC1719693. Epub 2004/09/24. eng.
23. Mitchell I, Paes BA, Li A, Lanctot KL, investigators C. CARESS: the Canadian registry of palivizumab. *Pediatr Infect Dis J*. 2011 Aug;30(8):651-5. PubMed PMID: 21343842.
24. Medrano Lopez C, Garcia-Guereta L. Community-acquired respiratory infections in young children with congenital heart diseases in the palivizumab era: the Spanish 4-season civic epidemiologic study. *Pediatr Infect Dis J*. 2010 Dec;29(12):1077-82. PubMed PMID: 20686437. Epub 2010/08/06. eng.
25. Kristensen K, Hjuler T, Ravn H, Simoes EA, Stensballe LG. Chronic diseases, chromosomal abnormalities, and congenital malformations as risk factors for respiratory syncytial virus hospitalization: a population-based cohort study. *Clin Infect Dis*. 2012 Mar;54(6):810-7. PubMed PMID: 22247121.
26. Resch B, Kurath-Koller S, Hahn J, Raith W, Kostenberger M, Gamillscheg A. Respiratory syncytial virus-associated hospitalizations over three consecutive seasons in children with congenital heart disease. *Eur J Clin Microbiol Infect Dis*. 2016 Jul;35(7):1165-9. PubMed PMID: 27126331.
27. Meberg A, Bruu AL. Respiratory syncytial virus infections in congenital heart defects--hospitalizations and costs. *Acta Paediatr*. 2006 Apr;95(4):404-6. PubMed PMID: 16720485. Epub 2006/05/25. eng.
28. Friedman D, Fryzek J, Jiang X, Bloomfield A, Ambrose CS, Wong PC. Respiratory syncytial virus hospitalization risk in the second year of life by specific congenital heart disease diagnoses. *PLoS One*. 2017;12(3):e0172512. PubMed PMID: 28253361. Pubmed Central PMCID: 5333829.
